# Supplementary material for: Integration of a CRISPR Cas12a-assisted multicolor biosensor and a micropipette tip enables visible point-of-care testing of foodborne Vibrio vulnificus
Source: Royal Society of Chemistry journal article supplement (doi:10.1039/d3an00714f), 2023-01-01
Supplement: d3an00714f1.pdf [file d3an00714f1.pdf]

# Integration of CRISPR Cas12a-assisted multicolor biosensor and micropipette-tip enables visible point-of-care testing of foodborne *Vibrio vulnificus*

Ziyi Wang,<sup>a</sup> Chutian Xu,<sup>b</sup> Chengkai Yu,<sup>c</sup> Zhenjun Si,<sup>d</sup> Di Huang,<sup>a\*</sup> Peijie Shen,<sup>a</sup>  
Mengjun Fang,<sup>a</sup> Zhinan Xu<sup>a\*</sup>

<sup>a</sup> *Key Laboratory of Biomass Chemical Engineering of Ministry of Education, College of Chemical and Biological Engineering, Zhejiang University, Hangzhou 310030, China.*

<sup>b</sup> *Department of Biomedical Engineering, Tufts University, Medford, Massachusetts 02155, United States.*

<sup>c</sup> *School of Life and Health Sciences, The Chinese University of Hong Kong (Shenzhen), Shenzhen 518172, China.*

<sup>d</sup> *Hangzhou FasTech Biotechnology Corporation Limited, Hangzhou 310030, China.*

\*Corresponding authors:

Prof. Zhinan Xu (znxu@zju.edu.cn)

Dr. Di Huang (huangdi@zju.edu.cn)

## Supporting Information

**Table S1** Oligonucleotides used for establishing the detection system in this study.

| Name                 | Sequence(5'→3')                                                                                                                                                                                                                                                                                                |
|----------------------|----------------------------------------------------------------------------------------------------------------------------------------------------------------------------------------------------------------------------------------------------------------------------------------------------------------|
| <i>vvhA</i> gene NTS | TCTGCGGGCTCGTCAACCAACAGCAGTACTGT<br>GAAACAACGTATTCGCATCGACTGGAATCATC<br>CACTGTTTGAAGCGGAAGCACACGTTACACTG<br>CAGTCATTGAGCAACAACGATCTCTGCCTAGA<br>TGTTTATGGTGAGAACGGTGACAAAACGGTTG<br>CGGGTGGTTCGGTTAACGGCTGGAGCTGTCAC<br>GGCAGTTGGAACCAAGTTTGGGGCCTAGATA<br>AAGAAGAACGTTATCGTAGCCGAGTGGCATC<br>CGATCGTTGTTTGACC |
| <i>vvhA</i> gene TS  | GGTCAAACAACGATCGGATGCCACTCGGCTA<br>CGATAACGTTCTTCTTTATCTAGGCCCAAAC<br>TTGGTTCCAACCTGCCGTGACAGCTCCAGCCGT<br>TAACCGAACCACCCGCAACCGTTTTGTCACCG<br>TTCTACCAATAAACATCTAGGCAGAGATCGTT<br>GTTGCTCAATGACTGCAGTGTAACGTGTGCTT<br>CCGCTTCAAACAGTGGATGATTCCAGTCGATG<br>CGAATACGTTGTTTCACAGTACTGCTGTTGGT<br>TGACGAGCCCGCAGA |
| 16S rDNA NTS         | ACTCCGTGCCAGCAGCCGCGGTAATACGGAG<br>GGTGCAGCGTTAATCGGAATTAAGGGCGTA<br>AAGCGCATGCAGGTGGTTTGTAAAGTCAGATG<br>TGAAAGCCCAGGGCTCAACCTCGGAACTGCA<br>TTTGAAGACTGGCAGACTAGAGTACTGTAGAG<br>GGGGGTAGAATTCAGGTGTAGCGGTGAAAT<br>GCGTAGAGATCTGAAGGAATACCGGTGGCGA<br>AGGCGGCCCCCTGGACAGATACTGACACTCA                           |

|                         |                                                                                                                                                                                                                                                                                                                |
|-------------------------|----------------------------------------------------------------------------------------------------------------------------------------------------------------------------------------------------------------------------------------------------------------------------------------------------------------|
|                         | GATGCGAAAGCGTGGGGAGC                                                                                                                                                                                                                                                                                           |
| 16S rDNA TS             | GCTCCCCACGCTTTCGCATCTGAGTGTCAGTA<br>TCTGTCCAGGGGGCCGCCTTCGCCACCGGTAT<br>TCCTTCAGATCTCTACGCATTTACCCGCTACA<br>CCTGAAATTCTACCCCCCTCTACAGTACTCTA<br>GTCTGCCAGTTTCAAATGCAGTTCCGAGGTTG<br>AGCCCCGGGCTTTCACATCTGACTTAACAAAC<br>CACCTGCATGCGCTTTACGCCAGTAATTCCG<br>ATTAACGCTCGCACCCCTCCGTATTACCGCGGC<br>TGCTGGCACGGAGT |
| <i>vvhA</i> -RAA-F      | CCACTGTTTGAAGCGGAAGCACACGTTACACT                                                                                                                                                                                                                                                                               |
| <i>vvhA</i> -RAA-R      | TCCAAC TGCCGTGACAGCTCCAGCCGTTAA                                                                                                                                                                                                                                                                                |
| 16S-RAA-F               | ATACGGAGGGT GCGAGCGTTAATCGGAATT                                                                                                                                                                                                                                                                                |
| 16S-RAA-R               | CCCACGCTTTCGCATCTGAGTGTCAGTATC                                                                                                                                                                                                                                                                                 |
| <i>vvhA</i> -crRNA      | UAAUUUCUACUAAGUGUAGAUUGGUGAGAA<br>CGGUGACAAAA                                                                                                                                                                                                                                                                  |
| 16S-crRNA               | UAAUUUCUACUAAGUGUAGAUAAACUGGCA<br>GACUAGAGUAC                                                                                                                                                                                                                                                                  |
| Fluorescence reporter   | 5'-HEX-TTATTATTATTA-BHQ <sub>1</sub> -3'                                                                                                                                                                                                                                                                       |
| Thiol-ssDNA             | 5'-Thiol-(T) <sub>74</sub> -<br>TCAGTGAATCGATCTAGTCAGTCAG-3'                                                                                                                                                                                                                                                   |
| Biotin-ssDNA            | 5'-Biotin-(T) <sub>74</sub> -<br>CTGACTGACTAGATCGATTCAGTGA-3'                                                                                                                                                                                                                                                  |
| <i>vvhA</i> -qPCR-F     | TTCCAAC TTCAAACCGAACTATGAC                                                                                                                                                                                                                                                                                     |
| <i>vvhA</i> -qPCR-R     | ATTCCAGTCGATGCGAATACGTTG                                                                                                                                                                                                                                                                                       |
| <i>vvhA</i> -qPCR-Probe | 5'-FAM-AACTATCGTGCACGCTTTGGTACCGT-<br>MGB-3'                                                                                                                                                                                                                                                                   |

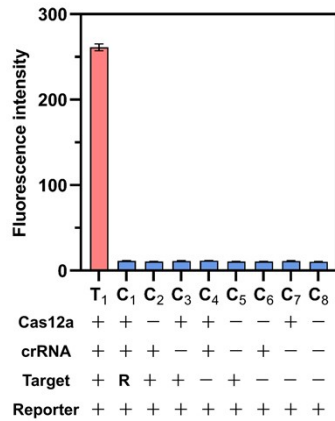

**Fig S1** Feasibility of fluorescence-CRISPR assay (each point showed the average result of three replicates; error bars represent the mean  $\pm$  S.D.). The Cas12a, crRNA, and target (100 nM) were selected as variables to verify the feasibility of fluorescence-CRISPR assay.

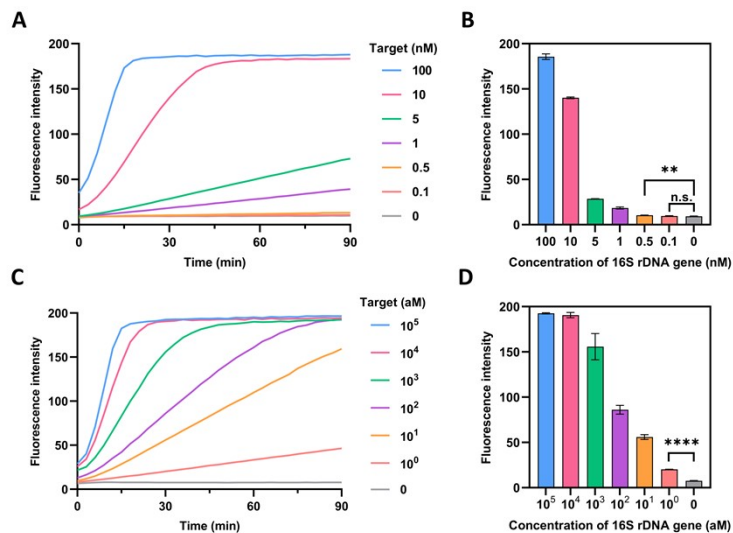

**Fig S2** Sensitivity of fluorescence-CRISPR assay. (A) and (B) Reaction kinetics and sensitivity of the fluorescence-CRISPR assay for 16S rDNA gene at 30 min (each curve and each point showed the average result of three replicates; error bars represent the mean  $\pm$  S.D.; \*\* $p < 0.01$ , n.s.: no significance in “Student’s t test”). (C) and (D) Reaction kinetics and sensitivity of the RAA-based fluorescence-CRISPR assay for 16S rDNA gene at 30 min (each curve and each point showed the average result of three replicates; error bars represent the mean  $\pm$  S.D.; \*\*\*\* $p < 0.0001$  in “Student’s t test”).

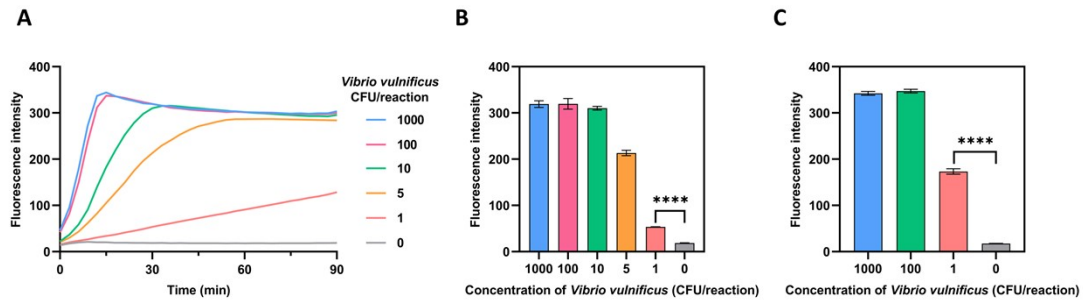

**Fig S3** Sensitivity of fluorescence-CRISPR assay in *Vibrio vulnificus* strain. (A) and (B) Reaction kinetics and sensitivity of the RAA-based fluorescence-CRISPR assay for *vvhA* gene at 30 min (each curve and each point showed the average result of three replicates; error bars represent the mean  $\pm$  S.D.; \*\*\*\* $p < 0.0001$  in “Student’s t test”). (C) Sensitivity of the RAA-based fluorescence-CRISPR assay for 16S rDNA gene at 30 min (each curve and each point showed the average result of three replicates; error bars represent the mean  $\pm$  S.D.; \*\*\*\* $p < 0.0001$  in “Student’s t test”).

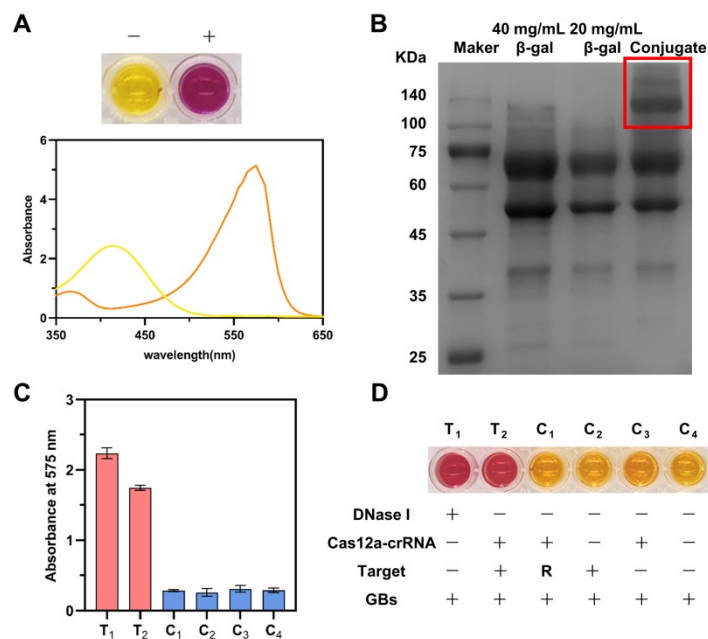

**Fig S4** Feasibility of GBs-CRISPR assay. (A) The absorption curve of CPR, and there was an absorption peak at 575 nm. The “+” solution was added with  $\beta$ -galactosidase, and “-” solution was added with the equal amount of water. (B) SDS-PAGE analysis of ssDNA and  $\beta$ -galactosidase conjugate and the larger molecular weight band represented the conjugate. (C) and (D) The value of the CPR absorption peak and the

color of detection solution after DNase I or Cas12a reaction in the visible assay using  $\beta$ -galactosidase-modified sepharose beads (each point showed the average result of three replicates; error bars represent the mean  $\pm$  S.D.). The DNase I (100 U/ $\mu$ L), Cas12a-crRNA, and target (100 nM) were selected as variables to verify the feasibility of GBs-CRISPR assay.

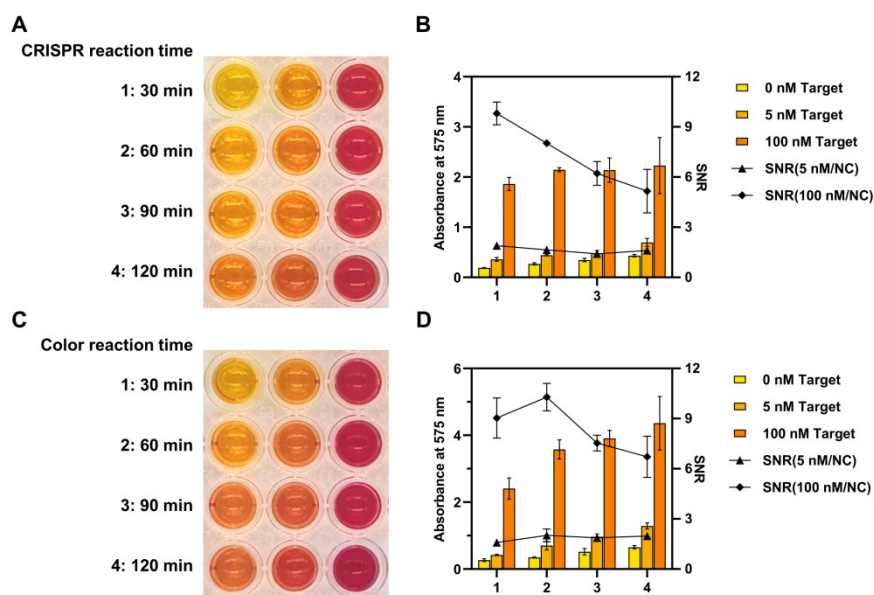

**Fig S5** Optimization of the GBs-CRISPR assay. (A) and (B) Optimization of the CRISPR reaction time. The CRISPR system was incubated at 37 °C for different times, and then CPRG was catalyzed by the filtered solution at 37 °C for 30 min. According to the results, 1 h was the relatively optimal CRISPR reaction time for this assay (each point showed the average result of three replicates; error bars represent the mean  $\pm$  S.D., SNR: Signal-to-Noise Ratio, NC: Negative Control). (C) and (D) Optimization of the color reaction time. The CRISPR system was incubated at 37 °C for 1 h, and then CPRG was catalyzed by the filtered solution at 37 °C for different times. According to the results, 1 h was the relatively optimal color reaction time for this assay (each point showed the average result of three replicates; error bars represent the mean  $\pm$  S.D., SNR: Signal-to-Noise Ratio, NC: Negative Control).

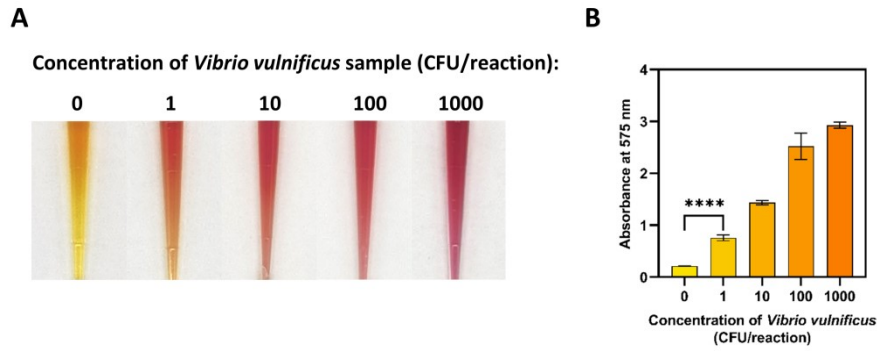

**Fig S6** Sensitivity of GBs-CRISPR assay. (A) The degree of color change in the solution was observed by the naked eye in the micropipette-tip to detect the 16S rDNA gene in *Vibrio vulnificus* strain. (B) The value of the CPR absorption peak was measured to detect the 16S rDNA gene in *Vibrio vulnificus* strain (each point showed the average result of three replicates; error bars represent the mean  $\pm$  S.D.; \*\*\*\* $p < 0.0001$  in “Student’s t test”).

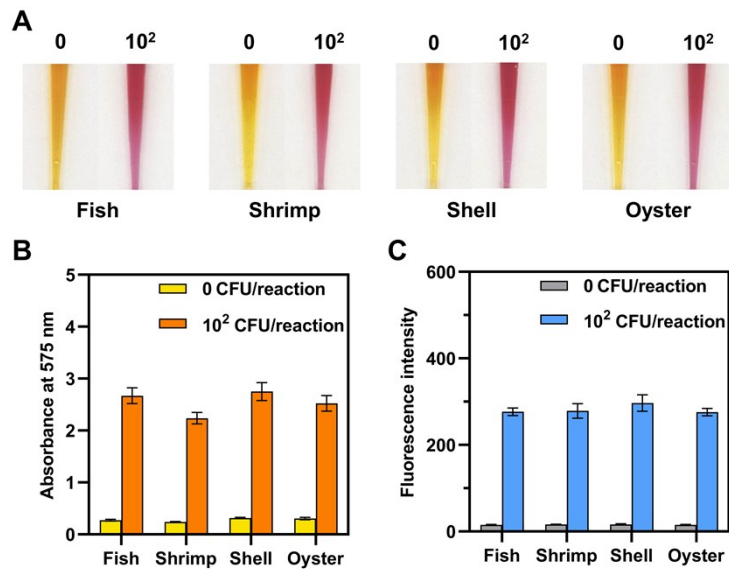

**Fig S7** Feasibility of GBs-CRISPR assay and fluorescence-CRISPR assay in the artificially contaminated seafood. (A) The degree of color change in the solution was observed by the naked eye in the micropipette-tip to detect the 16S rDNA gene in 4 kinds of seafood. (B) The value of the CPR absorption peak was measured to detect the 16S rDNA gene in 4 kinds of seafood (each point showed the average result of three replicates; error bars represent the mean  $\pm$  S.D.). (C) The fluorescence intensity of the RAA-based fluorescence-CRISPR assay for 16S rDNA gene in 4 kinds of seafood at 30 min (each point showed the average result of three replicates; error bars

represent the mean  $\pm$  S.D.).

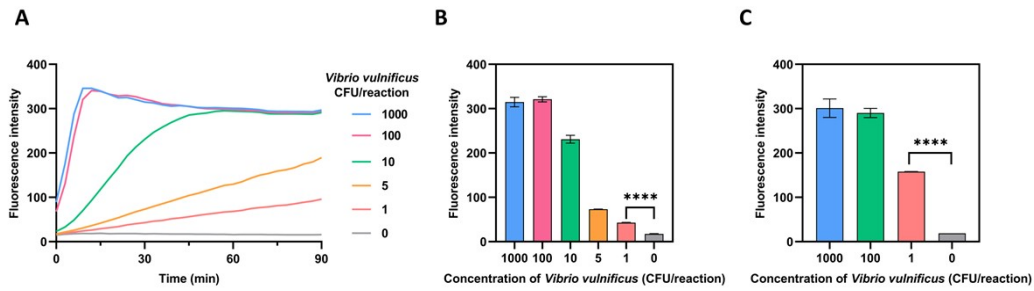

**Fig S8** Sensitivity of fluorescence-CRISPR assay in the artificially contaminated seafood. (A) and (B) Reaction kinetics and sensitivity of the RAA-based fluorescence-CRISPR assay for *vvhA* gene in the artificially contaminated fish sample at 30 min (each curve and each point showed the average result of three replicates; error bars represent the mean  $\pm$  S.D.; \*\*\*\* $p < 0.0001$  in “Student’s t test”). (C) Sensitivity of the RAA-based fluorescence-CRISPR assay for 16S rDNA gene in the artificially contaminated fish sample at 30 min (each curve and each point showed the average result of three replicates; error bars represent the mean  $\pm$  S.D.; \*\*\*\* $p < 0.0001$  in “Student’s t test”).

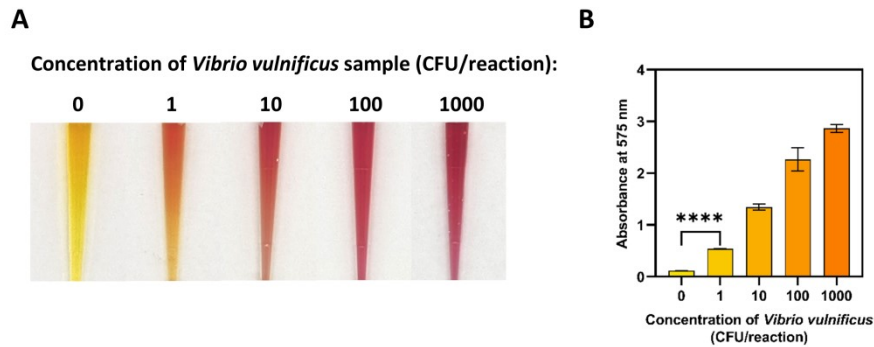

**Fig S9** Sensitivity of GBs-CRISPR assay in the artificially contaminated seafood. (A) The degree of color change in the solution was observed by the naked eye in the micropipette-tip to detect the 16S rDNA gene in the artificially contaminated fish samples. (B) The value of the CPR absorption peak was measured to detect the 16S rDNA gene in the artificially contaminated fish sample (each point showed the average result of three replicates; error bars represent the mean  $\pm$  S.D.; \*\*\*\* $p < 0.0001$  in “Student’s t test”).



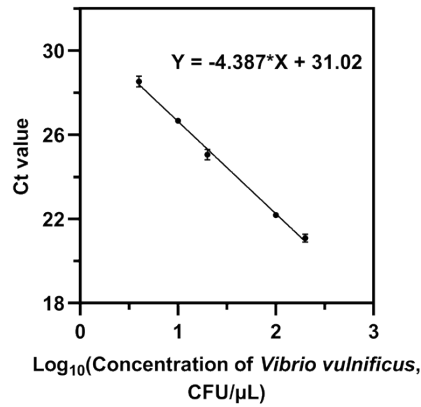

**Fig S10** Response of the Ct values vs. the concentrations of *Vibrio vulnificus* (CFU/μL) (each point showed the average result of three replicates; error bars represent the mean ± S.D.;  $R^2=0.993$ ).

**Table S2** Detection results from GBs-CRISPR and qPCR.

| Detection system         | Sample number | Spiked <i>Vibrio vulnificus</i> (CFU/μL) | qPCR                 |              | GBs-CRISPR          |                 |
|--------------------------|---------------|------------------------------------------|----------------------|--------------|---------------------|-----------------|
|                          |               |                                          | Quantitative results | Recovery (%) | Qualitative Results | Visible results |
| <i>Vibrio vulnificus</i> | S-1           | 0                                        | -                    | -            | N                   |                 |
|                          | S-2           | 0                                        | -                    | -            | N                   |                 |
|                          | S-3           | 0                                        | -                    | -            | N                   |                 |
|                          | S-4           | 0                                        | -                    | -            | N                   |                 |
|                          | S-5           | 4                                        | 3.73                 | 93.10        | P                   |                 |
|                          | S-6           | 6                                        | 5.53                 | 92.12        | P                   |                 |
|                          | S-7           | 8                                        | 9.82                 | 122.78       | P                   |                 |
|                          | S-8           | 10                                       | 9.85                 | 98.49        | P                   |                 |
|                          | S-9           | 14                                       | 16.42                | 117.32       | P                   |                 |
|                          | S-10          | 16                                       | 17.13                | 107.09       | P                   |                 |
|                          | S-11          | 18                                       | 19.41                | 107.84       | P                   |                 |
|                          | S-12          | 20                                       | 23.08                | 115.39       | P                   |                 |
|                          | S-13          | 40                                       | 47.11                | 117.77       | P                   |                 |
|                          | S-14          | 60                                       | 73.13                | 121.89       | P                   |                 |

|  |      |     |        |        |          |                                                                                     |
|--|------|-----|--------|--------|----------|-------------------------------------------------------------------------------------|
|  | S-15 | 80  | 85.11  | 106.39 | <b>P</b> |  |
|  | S-16 | 100 | 103.27 | 103.27 | <b>P</b> |  |
|  | S-17 | 120 | 125.88 | 104.90 | <b>P</b> |  |
|  | S-18 | 140 | 134.15 | 95.82  | <b>P</b> |  |
|  | S-19 | 160 | 166.33 | 103.96 | <b>P</b> |  |
|  | S-20 | 200 | 184.97 | 92.49  | <b>P</b> |  |

Notes: N means “Negative”, P means “Positive” in Table S2. The value of the CPR absorption peak  $< 0.35$  was negative and  $\geq 0.35$  was positive.

**Table S3** The comparison of different detection methods.

|                        | Detection method                      | Detection sensitivity          | Detection time | Reference |
|------------------------|---------------------------------------|--------------------------------|----------------|-----------|
| Immunoassay detection  | Chromatographic lateral flow assay    | 10 CFU/mL                      | <7 h           | [29]      |
|                        | DNAzyme-based biosensor               | $2.2 \times 10^3$ CFU/mL       | 5-10 min       | [30]      |
|                        | Dot-enzyme-linked immunosorbent assay | 1 CFU/mL                       | >6 h           | [31]      |
| Nucleic acid detection | LAMP                                  | 4 CFU/reaction                 | 16.5 h         | [32]      |
|                        | qPCR                                  | $10^2$ CFU/g                   | 9-12 h         | [33]      |
|                        | RAA-CRISPR/Cas12a                     | 2 copies/mL                    | 40 min         | [34]      |
|                        | multiplex PCR                         | 10 CFU/mL                      | >6 h           | [35]      |
|                        | Our assay (GBs-CRISPR)                | $10^2$ CFU/mL (1 CFU/reaction) | 3 h            | -         |
